# Supplementary material
Source: PubMed Central journal article supplement (PMC3468774)
Supplement: supp_WNL.0b013e3182661f74_znl04012001628.pdf [file supp_WNL.0b013e3182661f74_znl04012001628.pdf]

# From Alois to Amyvid

## Seeing Alzheimer disease

Ansgar J. Furst, PhD  
Geoffrey A. Kerchner,  
MD, PhD

Correspondence & reprint  
requests to Dr. Furst:  
ajfurst@stanford.edu

*Neurology*® 2012;79:1628–1629

When Alois Alzheimer first described the neuropathologic hallmarks of his eponymous disease (Alzheimer disease [AD]) in 1906,<sup>1</sup> the possibility of detecting amyloid plaques in vivo was unimaginable. About a century later, this became a reality when Klunk and colleagues<sup>2</sup> demonstrated that the <sup>11</sup>C-labeled PET tracer Pittsburgh compound B (PiB) selectively bound to fibrillar  $\beta$ -amyloid ( $A\beta$ ) and revealed amyloid pathology noninvasively in subjects with AD. However, due to its short half-life of 20 minutes and difficult manufacturing process, <sup>11</sup>C-PiB had no prospect for widespread use. <sup>18</sup>F-labeled  $A\beta$  ligands are easier to deploy broadly, and several candidates have been studied in clinical trials.<sup>3</sup> With the recent Food and Drug Administration approval of the first of them, florbetapir (Amyvid, or AV-45), we are now effectively entering the era of clinical amyloid imaging. Like PiB, florbetapir accurately predicts whether or not fibrillar  $A\beta$  pathology will be present at autopsy.<sup>4</sup>

In this issue of *Neurology*®, Doraiswamy et al.<sup>5</sup> present the first longitudinal data for florbetapir. This multicenter study features an initial cohort of 151 participants, across a diagnostic spectrum, who underwent both florbetapir scans and cognitive/functional testing at baseline. Of those, 140 returned for an 18-month follow-up assessment (67 cognitively normal [CN], 46 with mild cognitive impairment [MCI] defined in a way to approximate nonresearch settings, and 27 with AD dementia at baseline). Florbetapir scans were rated qualitatively (positive or negative) and quantitatively (comparing cerebral uptake to the cerebellum, a reference region unaffected in AD). Florbetapir-positive subjects with MCI had greater declines across most cognitive and functional measures than their florbetapir-negative peers; similar results emerged from the quantitative method of florbetapir scan analysis. Rates of decline among subjects with AD dementia and CN subjects depended much less upon florbetapir status, although it is notable that florbetapir-positive CN subjects did exhibit greater declines by 2 important

metrics, the Alzheimer's Disease Assessment Scale–Cognitive (ADAS-Cog, a multidomain cognitive battery) and the Clinical Dementia Rating scale, Sum of Boxes (CDR-SB, a multidomain rating scale). There was a trend for florbetapir positivity to predict a greater risk for MCI-to-AD dementia conversion at follow-up, but this was not significant. Unlike most studies, in which MCI is narrowly defined by a psychometric threshold, this study included any patient with a cognitive complaint (memory or otherwise) corroborated by an informant, with no requirement for an objective deficit. Therefore, the risk of decline associated with florbetapir positivity will likely generalize to MCI patients encountered in everyday clinical practice.

This study suggests that florbetapir—and amyloid imaging generally—may be clinically useful at informing prognosis as well as diagnosis. The findings are largely compatible with recent longitudinal studies using PiB,<sup>6</sup> with one notable exception: there was a low rate of florbetapir positivity (68%) among subjects with clinically diagnosed AD dementia in the present study. While poor sensitivity of florbetapir to plaque pathology could explain this finding, the Phase III data suggest a high negative predictive value<sup>7</sup> and support an alternative explanation, that 10 of 31 study participants with diagnoses of AD dementia actually had another etiologic diagnosis. The fact that florbetapir status did not correlate with the rate of cognitive or functional decline among the patients with dementia in this study is not necessarily surprising; whether due to AD or another illness, each patient had some progressive neurocognitive condition. In addition to teaching us humility, the high rate of florbetapir-negative dementia cases highlights a potential use of amyloid imaging in the clinic: it may help to spare clinically misdiagnosed patients from the cost or side effects of anti-amyloid therapies that are now in late-stage clinical development. And a negative florbetapir scan may trigger a more in-depth search for the right diagnosis, possibly boosting detection of reversible causes of dementia.

See page 1636

From the Departments of Neurology and Neurological Sciences (A.J.F., G.A.K.) and Psychiatry and Behavioral Sciences (A.J.F.), Stanford University School of Medicine, Stanford, CA; and War Related Illness and Injury Study Center (WRIISC) (A.J.F.), VA Palo Alto Health Care System, Palo Alto, CA. Go to [Neurology.org](http://Neurology.org) for full disclosures. Disclosures deemed relevant by the authors, if any, are provided at the end of this editorial.

One note of caution: interrater reliability for qualitative florbetapir scan analysis was suboptimal in this study. New training guidelines have been developed to overcome this problem, but it is not yet clear how reliable image analysis will be in the community. Automated, quantitative tools for scan analysis could help clinicians to avoid subjective pitfalls of qualitative reads.<sup>8</sup>

Doraiswamy et al. show that florbetapir may play a clinically useful role in predicting the risk of cognitive decline among patients with MCI, lending credibility to recently proposed criteria for MCI due to AD.<sup>9</sup> In patients who have already crossed the threshold to dementia, the lack of a close association between florbetapir and cognitive/functional status is not surprising since 1) A $\beta$  burden appears to remain fairly constant once amyloid positivity is reached, and 2) amyloid burden is no longer the driving force for disease progression once the clinical diagnosis of AD has been reached.<sup>10</sup> Its use in such patients will therefore be restricted to differential diagnosis. For cognitively normal individuals, there is not yet a role for amyloid imaging in screening for AD risk. Longer longitudinal follow-up will further clarify the prognostic utility of amyloid imaging, but for now, this study marks a milestone in our understanding of the role of amyloid imaging in our clinics.

#### DISCLOSURE

The authors report no disclosures relevant to the manuscript. **Go to [Neurology.org](http://Neurology.org) for full disclosures.**

#### REFERENCES

1. Alzheimer A. Über eine eigenartige Erkrankung der Hirnrinde. *Allgemeine Zeitschrift Psychiatrie* 1907;64:146–148.
2. Klunk WE, Engler H, Nordberg A, et al. Imaging brain amyloid in Alzheimer's disease with Pittsburgh compound B. *Ann Neurol* 2004;55:306–319.
3. Kerchner GA. Amyloid imaging for Alzheimer's disease. *Expert Opin Med Diagn* 2011;5:527–538.
4. Clark CM, Schneider JA, Bedell BJ, et al. Use of florbetapir-PET for imaging beta-amyloid pathology. *JAMA* 2011;305:275–283.
5. Doraiswamy PM, Sperling RA, Coleman RE, et al. Amyloid- $\beta$  assessed by florbetapir F 18 PET and 18-month cognitive decline: a multicenter study. *Neurology* 2012;79:1636–1644.
6. Villemagne VL, Pike KE, Chetelat G, et al. Longitudinal assessment of Abeta and cognition in aging and Alzheimer disease. *Ann Neurol* 2011;69:181–192.
7. Clark CM, Schneider JA, Bedell BJ, et al. Use of florbetapir-PET for imaging  $\beta$ -amyloid pathology. *JAMA* 2011;305:275–283.
8. Camus V, Payoux P, Barre L, et al. Using PET with 18F-AV-45 (florbetapir) to quantify brain amyloid load in a clinical environment. *Eur J Nucl Med Mol Imaging* 2012;39:621–631.
9. Sperling RA, Aisen PS, Beckett LA, et al. Toward defining the preclinical stages of Alzheimer's disease: recommendations from the National Institute on Aging–Alzheimer's Association workgroups on diagnostic guidelines for Alzheimer's disease. *Alzheimers Dement* 2011;7:280–292.
10. Furst AJ, Rabinovici GD, Rostomian AH, et al. Cognition, glucose metabolism and amyloid burden in Alzheimer's disease. *Neurobiol Aging* 2012;33:215–225.
